# Supplementary material for: A Mixed Periodic Paralysis & Myotonia Mutant, P1158S, Imparts pH-Sensitivity in Skeletal Muscle Voltage-gated Sodium Channels
Source: Springer Nature journal article supplement (doi:10.1038/s41598-018-24719-y), 2018-04-13
Supplement: MOESM1 [file 41598_2018_24719_moesm1_esm.pdf]

## **A Mixed Periodic Paralysis & Myotonia Mutant, P1158S, Imparts pH-Sensitivity in Skeletal Muscle Voltage-gated Sodium Channels**

Mohammad-Reza Ghovanloo <sup>1</sup>, Mena Abdelsayed <sup>1</sup>, Colin H. Peters <sup>1</sup>, Peter C. Ruben <sup>1\*</sup>

<sup>1</sup> Department of Biomedical Physiology and Kinesiology, Simon Fraser University, Burnaby, Canada

\* Corresponding Author: Dr. Peter C. Ruben, Department of Biomedical Physiology and Kinesiology, Simon Fraser University, 8888 University Drive, Burnaby, BC, Canada V5A 1S6.

e-mail: pruben@sfu.ca

phone: 778-782-9351

fax: 778-782-3424

## P1158S Imparts pH-Sensitivity in Nav1.4

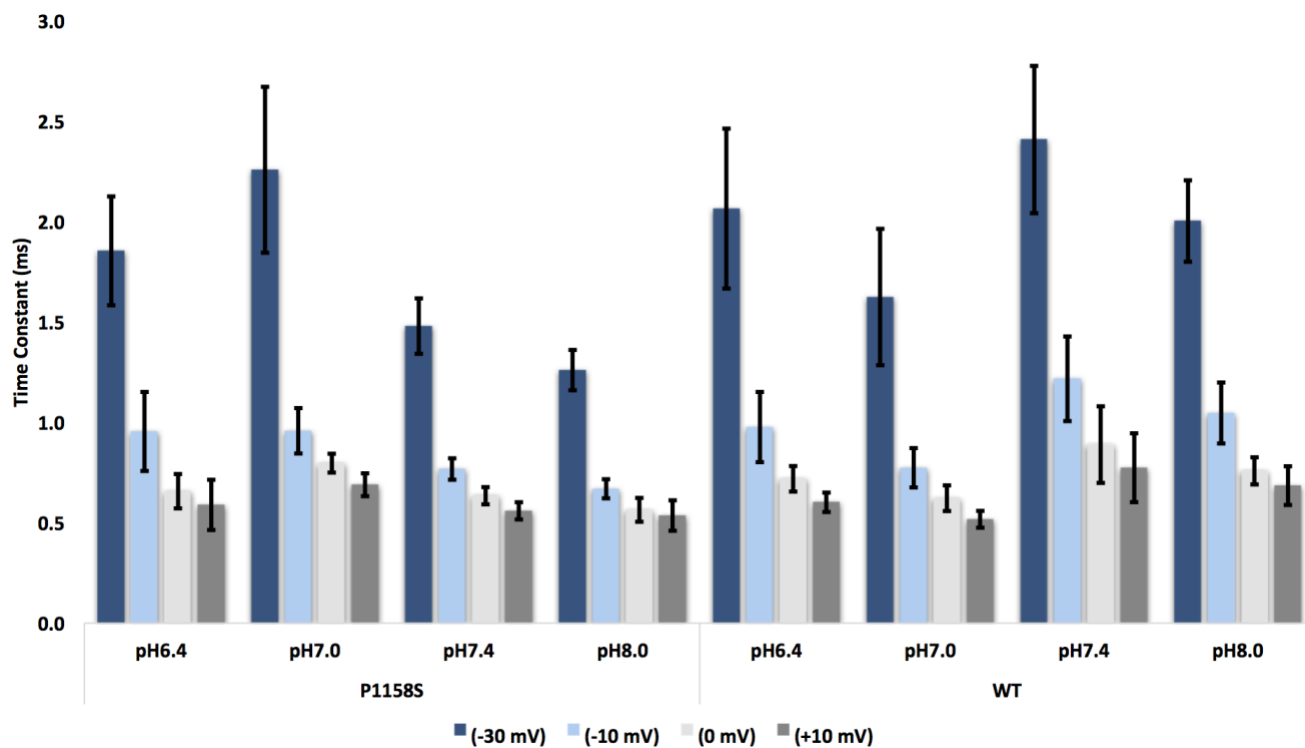

**Supplementary Fig. 1-** Open-state fast inactivation time constants across all conditions at: -30, -10, 0, +10 mV.

## P1158S Imparts pH-Sensitivity in Nav1.4

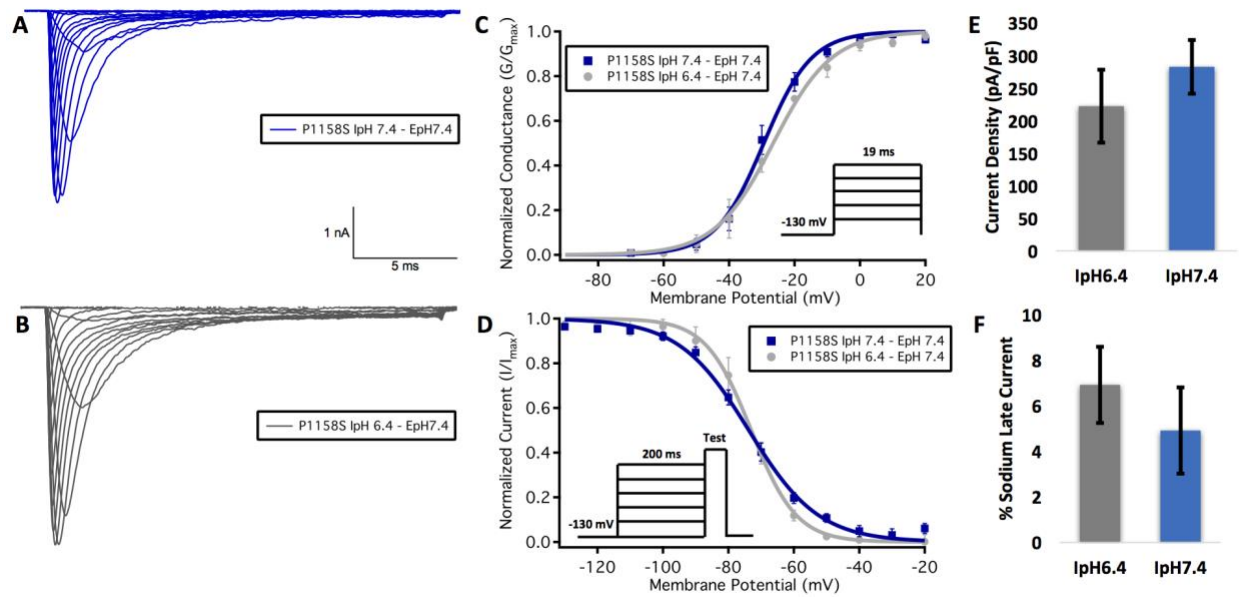

**Supplementary Fig. 2-** Effects of changing intracellular pH to 6.4. **(A-B)** Representative current traces of P1158S with both intra- and extracellular pH at 7.4, and intracellular pH6.4 and extracellular pH7.4, respectively. **(C)** Shows the voltage-dependence of activation for P1158S at intracellular pH7.4 (blue squares) and intracellular pH6.4 (grey circles). **(D)** Shows the voltage-dependence of steady-state fast inactivation for P1158S at intracellular pH7.4 (blue squares) and intracellular pH6.4 (grey circles). *Insets* show voltage protocols. **(E)** Shows average current density for P1158S channels at intracellular pH7.4 and 6.4. **(F)** Shows late sodium current as a percentage of peak sodium current for WT and P1158S channels.

**Supplementary Table 1- Conductance comparison across pH6.4 to 8.0 between WT and P1158S**

| Channel Type-pH | Mean $V_{1/2} \pm SE$ (mV) | Mean $z \pm SE$ (slope) | n |
|-----------------|----------------------------|-------------------------|---|
| P1158S-pH6.4    | $-19.48 \pm 2.22^A$        | $2.76 \pm 0.32$         | 9 |
| P1158S-pH7.0    | $-22.11 \pm 2.52^A$        | $2.68 \pm 0.36$         | 7 |
| P1158S-pH7.4    | $-29.95 \pm 2.35^B$        | $4.71 \pm 0.34$         | 8 |
| P1158S-pH8.0    | $-34.77 \pm 2.35^B$        | $3.02 \pm 0.34$         | 8 |
| WT-pH6.4        | $-25.86 \pm 2.72$          | $3.15 \pm 0.39$         | 6 |
| WT-pH7.0        | $-24.87 \pm 2.52$          | $3.56 \pm 0.36$         | 7 |
| WT-pH7.4        | $-24.84 \pm 2.52$          | $3.14 \pm 0.36$         | 7 |
| WT-pH8.0        | $-21.92 \pm 2.98$          | $3.16 \pm 0.43$         | 5 |

Letter codes indicate statistical significance. Numbers with different letter codes are significantly different.

**Supplementary Table 2- Peak conductance and current densities**

| Channel Type-pH | Mean density $\pm SE$ (pA/pF) | n  | Mean Conductance $\pm SE$ (nS/pF) | n  |
|-----------------|-------------------------------|----|-----------------------------------|----|
| P1158S-pH6.4    | $45.7 \pm 19.5^A$             | 9  | $1.06 \pm 0.45^A$                 | 9  |
| P1158S-pH7.0    | $70.4 \pm 20.7^A$             | 8  | $1.68 \pm 0.48^A$                 | 8  |
| P1158S-pH7.4    | $192.0 \pm 20.7^{B*}$         | 8  | $3.40 \pm 0.48^{B*}$              | 8  |
| P1158S-pH8.0    | $167.6 \pm 22.1^B$            | 7  | $3.86 \pm 0.51^B$                 | 7  |
| WT-pH6.4        | $77.2 \pm 26.1$               | 5  | $1.69 \pm 0.57$                   | 5  |
| WT-pH7.0        | $88.0 \pm 26.1$               | 5  | $1.90 \pm 0.57$                   | 5  |
| WT-pH7.4        | $110.2 \pm 18.5^*$            | 10 | $2.22 \pm 0.40^*$                 | 10 |
| WT-pH8.0        | $94.0 \pm 23.9$               | 6  | $1.78 \pm 0.52$                   | 6  |

Letter codes and asterisk indicate statistical significance. Numbers with different letter codes and/or matching asterisks are significantly different.

**Supplementary Table 3- Steady-state fast inactivation comparison across pH6.4 to 8.0 between WT and P1158S**

| Channel Type-pH | Mean $V_{1/2} \pm SE$ (mV) | Mean $z \pm SE$ (slope) | n |
|-----------------|----------------------------|-------------------------|---|
| P1158S-pH6.4    | $-70.18 \pm 3.16^A$        | $-2.96 \pm 0.25$        | 6 |
| P1158S-pH7.0    | $-70.95 \pm 2.74^A$        | $-2.53 \pm 0.21$        | 8 |
| P1158S-pH7.4    | $-74.52 \pm 2.58^B$        | $-2.63 \pm 0.20$        | 9 |
| P1158S-pH8.0    | $-84.54 \pm 3.16^B$        | $-2.41 \pm 0.25$        | 6 |
| WT-pH6.4        | $-68.41 \pm 3.16$          | $-3.74 \pm 0.25$        | 6 |
| WT-pH7.0        | $-67.65 \pm 2.74$          | $-3.32 \pm 0.21$        | 8 |
| WT-pH7.4        | $-67.77 \pm 2.58$          | $-2.49 \pm 0.20$        | 9 |
| WT-pH8.0        | $-67.44 \pm 2.74$          | $-3.27 \pm 0.21$        | 8 |

Letter codes indicate statistical significance. Numbers with different letter codes are significantly different.

**Supplementary Table 4- Open-state fast inactivation time constants across four voltages**

| Channel Type-pH | -30 mV $\tau \pm SE$ (ms) | -10 mV $\tau \pm SE$ (ms) | 0 mV $\tau \pm SE$ (ms) | +10 mV $\tau \pm SE$ (ms) | n  |
|-----------------|---------------------------|---------------------------|-------------------------|---------------------------|----|
| P1158S-pH6.4    | $1.85 \pm 0.27$           | $0.95 \pm 0.20$           | $0.66 \pm 0.09$         | $0.59 \pm 0.13$           | 7  |
| P1158S-pH7.0    | $2.26 \pm 0.41$           | $0.96 \pm 0.11$           | $0.80 \pm 0.05$         | $0.69 \pm 0.06$           | 4  |
| P1158S-pH7.4    | $1.48 \pm 0.14$           | $0.78 \pm 0.05$           | $0.63 \pm 0.04$         | $0.56 \pm 0.04$           | 13 |
| P1158S-pH8.0    | $1.26 \pm 0.10$           | $0.67 \pm 0.05$           | $0.56 \pm 0.06$         | $0.54 \pm 0.08$           | 7  |
| WT-pH6.4        | $2.06 \pm 0.40$           | $0.98 \pm 0.17$           | $0.72 \pm 0.06$         | $0.60 \pm 0.05$           | 6  |
| WT-pH7.0        | $1.62 \pm 0.34$           | $0.77 \pm 0.10$           | $0.62 \pm 0.06$         | $0.52 \pm 0.04$           | 6  |
| WT-pH7.4        | $2.41 \pm 0.37$           | $1.22 \pm 0.21$           | $0.89 \pm 0.20$         | $0.77 \pm 0.17$           | 8  |
| WT-pH8.0        | $2.00 \pm 0.20$           | $1.05 \pm 0.15$           | $0.76 \pm 0.07$         | $0.68 \pm 0.10$           | 7  |

**Supplementary Table 5- Late sodium current percentage across pH6.4 to 8.0**

| Channel Type-pH | Mean %INaL $\pm SE$ (%INaL) | n |
|-----------------|-----------------------------|---|
| P1158S-pH6.4    | $7.67 \pm 1.42^A$           | 9 |
| P1158S-pH7.0    | $8.96 \pm 1.81^A$           | 4 |
| P1158S-pH7.4    | $4.13 \pm 1.21^A$           | 6 |
| P1158S-pH8.0    | $5.18 \pm 1.46^A$           | 6 |
| WT-pH6.4        | $2.66 \pm 1.03^B$           | 4 |
| WT-pH7.0        | $3.33 \pm 1.03^B$           | 5 |
| WT-pH7.4        | $4.34 \pm 0.67^B$           | 5 |
| WT-pH8.0        | $2.57 \pm 0.95^B$           | 4 |

## P1158S Imparts pH-Sensitivity in Nav1.4

Letter codes indicate statistical significance. Numbers with different letter codes are significantly different.

**Supplementary Table 6- Use-dependent inactivation comparison between WT and P1158S**

| Channel Type-pH | Mean $\tau \pm SE$ (s) | n |
|-----------------|------------------------|---|
| P1158S-pH6.4    | $0.132 \pm 0.057^A$    | 4 |
| P1158S-pH7.0    | $0.725 \pm 0.238$      | 8 |
| P1158S-pH7.4    | $1.643 \pm 0.309$      | 3 |
| P1158S-pH8.0    | $1.753 \pm 0.539^B$    | 5 |
| WT-pH6.4        | $0.416 \pm 0.128$      | 3 |
| WT-pH7.0        | $0.849 \pm 0.090$      | 6 |
| WT-pH7.4        | $0.639 \pm 0.290$      | 4 |
| WT-pH8.0        | $0.711 \pm 0.290$      | 4 |

Letter codes indicate statistical significance. Numbers with different letter codes are significantly different.

**Supplementary Table 7- Intracellular acidosis biophysical parameters**

| Parameter                         | P1158S IpH7.4     | n  | P1158S IpH6.4     | n |
|-----------------------------------|-------------------|----|-------------------|---|
| Conductance $V_{1/2} \pm SE$ (mV) | $-29.95 \pm 2.41$ | 8  | $-31.67 \pm 2.58$ | 7 |
| Conductance $z \pm SE$ (slope)    | $4.71 \pm 0.56$   | 8  | $3.34 \pm 0.60$   | 7 |
| SSFI $V_{1/2} \pm SE$ (mV)        | $-74.52 \pm 2.43$ | 9  | $-77.78 \pm 2.75$ | 7 |
| SSFI $z \pm SE$ (slope)           | $-2.63 \pm 0.24$  | 9  | $-3.10 \pm 0.27$  | 7 |
| Current density $\pm SE$ (pA/pF)  | $282.7 \pm 45.3$  | 10 | $222.3 \pm 50.7$  | 8 |
| %INaL $\pm SE$ (%INaL)            | $4.91 \pm 1.72$   | 6  | $6.92 \pm 2.43$   | 3 |
